# Supplementary material for: Isolation and Characterization of Biohydrogen-Producing Bacteria for Biohydrogen Fermentation Using Oil Palm Biomass-Based Carbon Source
Source: MDPI journal article supplement (doi:10.3390/app13010656), 2023-01-03
Supplement: s1 [file s1]

**Supplementary Material for the paper entitled “Isolation and Characterization of Biohydrogen-Producing Bacteria for Biohydrogen Fermentation using Oil Palm Biomass-based Carbon Source”.**

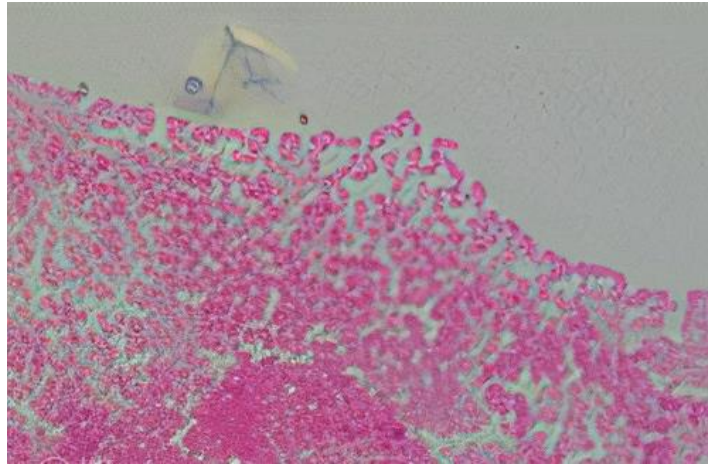

**Figure S1.** Negative gram-stained isolate KBH 6958 under 10X magnification using light microscope.
