# Supplementary material for: Isolation and Characterization of Biohydrogen-Producing Bacteria for Biohydrogen Fermentation Using Oil Palm Biomass-Based Carbon Source
Source: MDPI journal article supplement (doi:10.3390/app13010656), 2023-01-03
Supplement: s1 [file s1]

Archive with 1 entries (1 files):
- applsci-2096592-supplementary.pdf
